# Supplementary material for: Determining minimal important change for the thyroid-related quality of life questionnaire ThyPRO
Source: PubMed Central journal article supplement (PMC8052573; doi:10.1530/ec-21-0026), 2021-02-10
Supplement: supplementary_table_1.pdf [file supplementary_table_1.pdf]

# Quality of Life Questionnaire for Patients with Thyroid Disease

-ThyPROus-

This questionnaire is about how your thyroid disease has affected your life.

**Please answer each question by marking  by the answer that best fits you. If you are unsure about how you want to answer, please give the best answer you can.**

The first section of the questionnaire is about symptoms, tiredness, memory, mood, and health.

Please base your **answers on how you have been feeling in general** during the past 4 weeks.

**1. The first questions are about symptoms**

**During the past 4 weeks have you**

| Not at all | A little | Some | Quite a bit | Very much |
|------------|----------|------|-------------|-----------|
|------------|----------|------|-------------|-----------|

|    | ▼                                                              | ▼                        | ▼                        | ▼                        | ▼                        |                          |
|----|----------------------------------------------------------------|--------------------------|--------------------------|--------------------------|--------------------------|--------------------------|
| 1a | - had the sensation of fullness in the neck?.....              | <input type="checkbox"/> | <input type="checkbox"/> | <input type="checkbox"/> | <input type="checkbox"/> | <input type="checkbox"/> |
| 1b | - had a <u>visible</u> swelling in the front of your neck?..   | <input type="checkbox"/> | <input type="checkbox"/> | <input type="checkbox"/> | <input type="checkbox"/> | <input type="checkbox"/> |
| 1c | - felt pressure in your throat?.....                           | <input type="checkbox"/> | <input type="checkbox"/> | <input type="checkbox"/> | <input type="checkbox"/> | <input type="checkbox"/> |
| 1d | - had pain in the front of your throat? .....                  | <input type="checkbox"/> | <input type="checkbox"/> | <input type="checkbox"/> | <input type="checkbox"/> | <input type="checkbox"/> |
| 1e | - had pain in your neck that could be felt in your ears? ..... | <input type="checkbox"/> | <input type="checkbox"/> | <input type="checkbox"/> | <input type="checkbox"/> | <input type="checkbox"/> |
| 1f | - had the sensation of a lump in your throat? .....            | <input type="checkbox"/> | <input type="checkbox"/> | <input type="checkbox"/> | <input type="checkbox"/> | <input type="checkbox"/> |
| 1g | - had the need to clear your throat frequently?.....           | <input type="checkbox"/> | <input type="checkbox"/> | <input type="checkbox"/> | <input type="checkbox"/> | <input type="checkbox"/> |
| 1h | - felt discomfort swallowing? .....                            | <input type="checkbox"/> | <input type="checkbox"/> | <input type="checkbox"/> | <input type="checkbox"/> | <input type="checkbox"/> |
| 1i | - had difficulty swallowing?.....                              | <input type="checkbox"/> | <input type="checkbox"/> | <input type="checkbox"/> | <input type="checkbox"/> | <input type="checkbox"/> |
| 1j | - had the sensation of suffocating? .....                      | <input type="checkbox"/> | <input type="checkbox"/> | <input type="checkbox"/> | <input type="checkbox"/> | <input type="checkbox"/> |
| 1k | - been hoarse?.....                                            | <input type="checkbox"/> | <input type="checkbox"/> | <input type="checkbox"/> | <input type="checkbox"/> | <input type="checkbox"/> |
| 1l | - had trembling hands? .....                                   | <input type="checkbox"/> | <input type="checkbox"/> | <input type="checkbox"/> | <input type="checkbox"/> | <input type="checkbox"/> |
| 1m | - had a tendency to sweat a lot? .....                         | <input type="checkbox"/> | <input type="checkbox"/> | <input type="checkbox"/> | <input type="checkbox"/> | <input type="checkbox"/> |
| 1n | - experienced palpitations (rapid heart beat)?.....            | <input type="checkbox"/> | <input type="checkbox"/> | <input type="checkbox"/> | <input type="checkbox"/> | <input type="checkbox"/> |
| 1o | - experienced shortness of breath?.....                        | <input type="checkbox"/> | <input type="checkbox"/> | <input type="checkbox"/> | <input type="checkbox"/> | <input type="checkbox"/> |
| 1p | - been sensitive to heat? .....                                | <input type="checkbox"/> | <input type="checkbox"/> | <input type="checkbox"/> | <input type="checkbox"/> | <input type="checkbox"/> |
| 1q | - been sensitive to cold? .....                                | <input type="checkbox"/> | <input type="checkbox"/> | <input type="checkbox"/> | <input type="checkbox"/> | <input type="checkbox"/> |
| 1r | - had an increased appetite?.....                              | <input type="checkbox"/> | <input type="checkbox"/> | <input type="checkbox"/> | <input type="checkbox"/> | <input type="checkbox"/> |

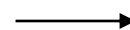

**During the past 4 weeks have you**

| Not at all | A little | Some | Quite a bit | Very much |
|------------|----------|------|-------------|-----------|
| ▼          | ▼        | ▼    | ▼           | ▼         |

|     |                                                                   |                          |                          |                          |                          |                          |
|-----|-------------------------------------------------------------------|--------------------------|--------------------------|--------------------------|--------------------------|--------------------------|
| 1s  | - had loose stools? .....                                         | <input type="checkbox"/> | <input type="checkbox"/> | <input type="checkbox"/> | <input type="checkbox"/> | <input type="checkbox"/> |
| 1t  | - had an upset stomach? .....                                     | <input type="checkbox"/> | <input type="checkbox"/> | <input type="checkbox"/> | <input type="checkbox"/> | <input type="checkbox"/> |
| 1u  | - had moist or watery eyes? .....                                 | <input type="checkbox"/> | <input type="checkbox"/> | <input type="checkbox"/> | <input type="checkbox"/> | <input type="checkbox"/> |
| 1v  | - had bags under the eyes or swollen eyelids? .....               | <input type="checkbox"/> | <input type="checkbox"/> | <input type="checkbox"/> | <input type="checkbox"/> | <input type="checkbox"/> |
| 1w  | - had the sensation of dryness or "grittiness" in the eyes? ..... | <input type="checkbox"/> | <input type="checkbox"/> | <input type="checkbox"/> | <input type="checkbox"/> | <input type="checkbox"/> |
| 1x  | - had impaired vision? .....                                      | <input type="checkbox"/> | <input type="checkbox"/> | <input type="checkbox"/> | <input type="checkbox"/> | <input type="checkbox"/> |
| 1y  | - felt pressure in (or behind) the eyes? .....                    | <input type="checkbox"/> | <input type="checkbox"/> | <input type="checkbox"/> | <input type="checkbox"/> | <input type="checkbox"/> |
| 1z  | - had double vision? .....                                        | <input type="checkbox"/> | <input type="checkbox"/> | <input type="checkbox"/> | <input type="checkbox"/> | <input type="checkbox"/> |
| 1aa | - had eye pain? .....                                             | <input type="checkbox"/> | <input type="checkbox"/> | <input type="checkbox"/> | <input type="checkbox"/> | <input type="checkbox"/> |
| 1bb | - been very sensitive to light? .....                             | <input type="checkbox"/> | <input type="checkbox"/> | <input type="checkbox"/> | <input type="checkbox"/> | <input type="checkbox"/> |
| 1cc | - had swollen hands or feet? .....                                | <input type="checkbox"/> | <input type="checkbox"/> | <input type="checkbox"/> | <input type="checkbox"/> | <input type="checkbox"/> |
| 1dd | - had dry skin? .....                                             | <input type="checkbox"/> | <input type="checkbox"/> | <input type="checkbox"/> | <input type="checkbox"/> | <input type="checkbox"/> |
| 1ee | - had itchy skin? .....                                           | <input type="checkbox"/> | <input type="checkbox"/> | <input type="checkbox"/> | <input type="checkbox"/> | <input type="checkbox"/> |

**2. The following questions are about tiredness**

**During the past 4 weeks have you**

| Not at all | A little | Some | Quite a bit | Very much |
|------------|----------|------|-------------|-----------|
| ▼          | ▼        | ▼    | ▼           | ▼         |

|    |                                                                 |                          |                          |                          |                          |                          |
|----|-----------------------------------------------------------------|--------------------------|--------------------------|--------------------------|--------------------------|--------------------------|
| 2a | - been tired? .....                                             | <input type="checkbox"/> | <input type="checkbox"/> | <input type="checkbox"/> | <input type="checkbox"/> | <input type="checkbox"/> |
| 2b | - been exhausted? .....                                         | <input type="checkbox"/> | <input type="checkbox"/> | <input type="checkbox"/> | <input type="checkbox"/> | <input type="checkbox"/> |
| 2c | - had difficulty getting motivated to do anything at all? ..... | <input type="checkbox"/> | <input type="checkbox"/> | <input type="checkbox"/> | <input type="checkbox"/> | <input type="checkbox"/> |
| 2d | - felt worn out? .....                                          | <input type="checkbox"/> | <input type="checkbox"/> | <input type="checkbox"/> | <input type="checkbox"/> | <input type="checkbox"/> |

**3. The following questions are about your vitality**

| During the past 4 weeks have you |                                                          | Not at all               | A little                 | Some                     | Quite a bit              | Very much                |
|----------------------------------|----------------------------------------------------------|--------------------------|--------------------------|--------------------------|--------------------------|--------------------------|
|                                  |                                                          | ▼                        | ▼                        | ▼                        | ▼                        | ▼                        |
| 3a                               | - felt full of life? .....                               | <input type="checkbox"/> | <input type="checkbox"/> | <input type="checkbox"/> | <input type="checkbox"/> | <input type="checkbox"/> |
| 3b                               | - felt energetic? .....                                  | <input type="checkbox"/> | <input type="checkbox"/> | <input type="checkbox"/> | <input type="checkbox"/> | <input type="checkbox"/> |
| 3c                               | - been able to cope with the demands of your life? ..... | <input type="checkbox"/> | <input type="checkbox"/> | <input type="checkbox"/> | <input type="checkbox"/> | <input type="checkbox"/> |

**4. The following questions are about memory and concentration**

| During the past 4 weeks have you |                                                 | Not at all               | A little                 | Some                     | Quite a bit              | Very much                |
|----------------------------------|-------------------------------------------------|--------------------------|--------------------------|--------------------------|--------------------------|--------------------------|
|                                  |                                                 | ▼                        | ▼                        | ▼                        | ▼                        | ▼                        |
| 4a                               | - had difficulty remembering? .....             | <input type="checkbox"/> | <input type="checkbox"/> | <input type="checkbox"/> | <input type="checkbox"/> | <input type="checkbox"/> |
| 4b                               | - had slow or unclear thinking? .....           | <input type="checkbox"/> | <input type="checkbox"/> | <input type="checkbox"/> | <input type="checkbox"/> | <input type="checkbox"/> |
| 4c                               | - had difficulty finding the right words? ..... | <input type="checkbox"/> | <input type="checkbox"/> | <input type="checkbox"/> | <input type="checkbox"/> | <input type="checkbox"/> |
| 4d                               | - been confused? .....                          | <input type="checkbox"/> | <input type="checkbox"/> | <input type="checkbox"/> | <input type="checkbox"/> | <input type="checkbox"/> |
| 4e                               | - had difficulty learning something new? .....  | <input type="checkbox"/> | <input type="checkbox"/> | <input type="checkbox"/> | <input type="checkbox"/> | <input type="checkbox"/> |
| 4f                               | - had difficulty concentrating? .....           | <input type="checkbox"/> | <input type="checkbox"/> | <input type="checkbox"/> | <input type="checkbox"/> | <input type="checkbox"/> |

**5. The following questions are about nervousness and tension**

| During the past 4 weeks have you |                                                  | Not at all               | A little                 | Some                     | Quite a bit              | Very much                |
|----------------------------------|--------------------------------------------------|--------------------------|--------------------------|--------------------------|--------------------------|--------------------------|
|                                  |                                                  | ▼                        | ▼                        | ▼                        | ▼                        | ▼                        |
| 5a                               | - felt nervous?.....                             | <input type="checkbox"/> | <input type="checkbox"/> | <input type="checkbox"/> | <input type="checkbox"/> | <input type="checkbox"/> |
| 5b                               | - felt afraid or anxious?.....                   | <input type="checkbox"/> | <input type="checkbox"/> | <input type="checkbox"/> | <input type="checkbox"/> | <input type="checkbox"/> |
| 5c                               | - felt tense?.....                               | <input type="checkbox"/> | <input type="checkbox"/> | <input type="checkbox"/> | <input type="checkbox"/> | <input type="checkbox"/> |
| 5d                               | - been concerned about being seriously ill?..... | <input type="checkbox"/> | <input type="checkbox"/> | <input type="checkbox"/> | <input type="checkbox"/> | <input type="checkbox"/> |
| 5e                               | - felt uneasy?.....                              | <input type="checkbox"/> | <input type="checkbox"/> | <input type="checkbox"/> | <input type="checkbox"/> | <input type="checkbox"/> |
| 5f                               | - felt restless?.....                            | <input type="checkbox"/> | <input type="checkbox"/> | <input type="checkbox"/> | <input type="checkbox"/> | <input type="checkbox"/> |

**6. The following questions are about psychological well-being**

| During the past 4 weeks have you |                          | Not at all               | A little                 | Some                     | Quite a bit              | Very much                |
|----------------------------------|--------------------------|--------------------------|--------------------------|--------------------------|--------------------------|--------------------------|
|                                  |                          | ▼                        | ▼                        | ▼                        | ▼                        | ▼                        |
| 6a                               | - felt sad?.....         | <input type="checkbox"/> | <input type="checkbox"/> | <input type="checkbox"/> | <input type="checkbox"/> | <input type="checkbox"/> |
| 6b                               | - felt depressed?.....   | <input type="checkbox"/> | <input type="checkbox"/> | <input type="checkbox"/> | <input type="checkbox"/> | <input type="checkbox"/> |
| 6c                               | - felt discouraged?..... | <input type="checkbox"/> | <input type="checkbox"/> | <input type="checkbox"/> | <input type="checkbox"/> | <input type="checkbox"/> |
| 6d                               | - cried easily?.....     | <input type="checkbox"/> | <input type="checkbox"/> | <input type="checkbox"/> | <input type="checkbox"/> | <input type="checkbox"/> |
| 6e                               | - felt unhappy?.....     | <input type="checkbox"/> | <input type="checkbox"/> | <input type="checkbox"/> | <input type="checkbox"/> | <input type="checkbox"/> |

| During the past 4 weeks have you |                             | Not at all               | A little                 | Some                     | Quite a bit              | Very much                |
|----------------------------------|-----------------------------|--------------------------|--------------------------|--------------------------|--------------------------|--------------------------|
|                                  |                             | ▼                        | ▼                        | ▼                        | ▼                        | ▼                        |
| 6f                               | - felt happy?.....          | <input type="checkbox"/> | <input type="checkbox"/> | <input type="checkbox"/> | <input type="checkbox"/> | <input type="checkbox"/> |
| 6g                               | - had self-confidence?..... | <input type="checkbox"/> | <input type="checkbox"/> | <input type="checkbox"/> | <input type="checkbox"/> | <input type="checkbox"/> |

**7. The following questions are about having difficulty coping or having mood swings**

**During the past 4 weeks have you**

|                                              | Not at all               | A little                 | Some                     | Quite a bit              | Very much                |
|----------------------------------------------|--------------------------|--------------------------|--------------------------|--------------------------|--------------------------|
|                                              | ▼                        | ▼                        | ▼                        | ▼                        | ▼                        |
| 7a - had difficulty coping? .....            | <input type="checkbox"/> | <input type="checkbox"/> | <input type="checkbox"/> | <input type="checkbox"/> | <input type="checkbox"/> |
| 7b - felt "not like yourself"? .....         | <input type="checkbox"/> | <input type="checkbox"/> | <input type="checkbox"/> | <input type="checkbox"/> | <input type="checkbox"/> |
| 7c - noticed you easily felt stressed? ..... | <input type="checkbox"/> | <input type="checkbox"/> | <input type="checkbox"/> | <input type="checkbox"/> | <input type="checkbox"/> |
| 7d - had mood swings? .....                  | <input type="checkbox"/> | <input type="checkbox"/> | <input type="checkbox"/> | <input type="checkbox"/> | <input type="checkbox"/> |
| 7e - felt irritable? .....                   | <input type="checkbox"/> | <input type="checkbox"/> | <input type="checkbox"/> | <input type="checkbox"/> | <input type="checkbox"/> |
| 7f - felt frustrated? .....                  | <input type="checkbox"/> | <input type="checkbox"/> | <input type="checkbox"/> | <input type="checkbox"/> | <input type="checkbox"/> |
| 7g - felt angry? .....                       | <input type="checkbox"/> | <input type="checkbox"/> | <input type="checkbox"/> | <input type="checkbox"/> | <input type="checkbox"/> |

|                                          | Not at all               | A little                 | Some                     | Quite a bit              | Completely               |
|------------------------------------------|--------------------------|--------------------------|--------------------------|--------------------------|--------------------------|
|                                          | ▼                        | ▼                        | ▼                        | ▼                        | ▼                        |
| 7h - felt in control of your life? ..... | <input type="checkbox"/> | <input type="checkbox"/> | <input type="checkbox"/> | <input type="checkbox"/> | <input type="checkbox"/> |
| 7i - felt in balance? .....              | <input type="checkbox"/> | <input type="checkbox"/> | <input type="checkbox"/> | <input type="checkbox"/> | <input type="checkbox"/> |

The remainder of the questionnaire is about **how your thyroid disease may have affected various aspects of your life**

**8. The following questions are about your relationships with other people**

**During the past 4 weeks, has your thyroid disease caused you to**

|            |          |      |             |           |
|------------|----------|------|-------------|-----------|
| Not at all | A little | Some | Quite a bit | Very much |
| ▼          | ▼        | ▼    | ▼           | ▼         |

8a - have difficulty being together with other people (for example, spouse, children, boy/girlfriend, friends, or others)?.....  .....  .....  .....  .....

8b - feel you were a burden to other people?.....  .....  .....  .....  .....

8c - have conflicts with other people?.....  .....  .....  .....  .....

**During the past 4 weeks have you**

|            |          |      |             |           |
|------------|----------|------|-------------|-----------|
| Not at all | A little | Some | Quite a bit | Very much |
| ▼          | ▼        | ▼    | ▼           | ▼         |

8d - felt that people in your surroundings have lacked understanding of your thyroid disease?.....  .....  .....  .....  .....

**9. The following questions are about your daily activities**

**During the past 4 weeks, has your thyroid disease caused you to**

| Not at all | A little | Some | Quite a bit | Very much |
|------------|----------|------|-------------|-----------|
| ▼          | ▼        | ▼    | ▼           | ▼         |

- 9a - have difficulty managing your daily life? .....  .....  .....  .....  .....
- 9b - limit your leisure activities or hobbies?.....  .....  .....  .....  .....
- 9c - not be able to participate in life around you?.....  .....  .....  .....  .....
- 9d - have difficulty getting around (for example, walking, running, bicycling, or driving a car)? .....  .....  .....  .....  .....
- 9e - feel as if everything takes longer to do?.....  .....  .....  .....  .....

**During the past 4 weeks, has your thyroid disease caused you to**

| I do not work | Not at all | A little | Some | Quite a bit | Very much |
|---------------|------------|----------|------|-------------|-----------|
| ▼             | ▼          | ▼        | ▼    | ▼           | ▼         |

- 9f - have difficulty managing your job (for example, finding it hard to cope or calling in sick)? .....  .....  .....  .....  .....



**10. The following questions are about your sex life**

|                                         |                                                                              | Not at all               | A little                 | Some                     | Quite a bit              | Very much                |
|-----------------------------------------|------------------------------------------------------------------------------|--------------------------|--------------------------|--------------------------|--------------------------|--------------------------|
| <b>During the past 4 weeks have you</b> |                                                                              | ▼                        | ▼                        | ▼                        | ▼                        | ▼                        |
| 10a                                     | - felt your thyroid disease had a negative influence on your sex life? ..... | <input type="checkbox"/> | <input type="checkbox"/> | <input type="checkbox"/> | <input type="checkbox"/> | <input type="checkbox"/> |
| 10b                                     | - had a decreased sexual desire? .....                                       | <input type="checkbox"/> | <input type="checkbox"/> | <input type="checkbox"/> | <input type="checkbox"/> | <input type="checkbox"/> |

**11. Thyroid diseases (or their treatment) may affect your appearance. (For example, by causing swelling of the neck, swollen face, hands, or feet, or changes in weight or to the eyes.)**

|                                 |                                                                                                                                            | Not at all               | A little                 | Some                     | Quite a bit              | Very much                |
|---------------------------------|--------------------------------------------------------------------------------------------------------------------------------------------|--------------------------|--------------------------|--------------------------|--------------------------|--------------------------|
| <b>During the past 4 weeks,</b> |                                                                                                                                            | ▼                        | ▼                        | ▼                        | ▼                        | ▼                        |
| 11a                             | - has your thyroid disease <u>affected your appearance</u> (for example, swelling of the neck, eye changes, weight changes)? .....         | <input type="checkbox"/> | <input type="checkbox"/> | <input type="checkbox"/> | <input type="checkbox"/> | <input type="checkbox"/> |
| 11b                             | - have you been <u>unsatisfied</u> with your appearance because of your thyroid disease? .....                                             | <input type="checkbox"/> | <input type="checkbox"/> | <input type="checkbox"/> | <input type="checkbox"/> | <input type="checkbox"/> |
| 11c                             | - have you tried to <u>camouflage or mask</u> visible signs of your thyroid disease (for example, by wearing a scarf or sunglasses)? ..... | <input type="checkbox"/> | <input type="checkbox"/> | <input type="checkbox"/> | <input type="checkbox"/> | <input type="checkbox"/> |
| 11d                             | - have you been bothered by other people looking at you? .....                                                                             | <input type="checkbox"/> | <input type="checkbox"/> | <input type="checkbox"/> | <input type="checkbox"/> | <input type="checkbox"/> |
| 11e                             | - has your thyroid disease influenced which clothes you wear? .....                                                                        | <input type="checkbox"/> | <input type="checkbox"/> | <input type="checkbox"/> | <input type="checkbox"/> | <input type="checkbox"/> |
| 11f                             | - has your thyroid disease made you feel too fat? .....                                                                                    | <input type="checkbox"/> | <input type="checkbox"/> | <input type="checkbox"/> | <input type="checkbox"/> | <input type="checkbox"/> |

**12. The final question is about to what extent your thyroid disease has affected you overall during the past 4 weeks**

**During the past 4 weeks,**

|               |          |      |                |              |
|---------------|----------|------|----------------|--------------|
| Not at<br>all | A little | Some | Quite a<br>bit | Very<br>much |
| ▼             | ▼        | ▼    | ▼              | ▼            |

12

- has your thyroid disease had a negative effect on your quality of life? .....

|                          |       |                          |       |                          |       |                          |       |                          |       |                          |
|--------------------------|-------|--------------------------|-------|--------------------------|-------|--------------------------|-------|--------------------------|-------|--------------------------|
| <input type="checkbox"/> | ..... | <input type="checkbox"/> | ..... | <input type="checkbox"/> | ..... | <input type="checkbox"/> | ..... | <input type="checkbox"/> | ..... | <input type="checkbox"/> |
|--------------------------|-------|--------------------------|-------|--------------------------|-------|--------------------------|-------|--------------------------|-------|--------------------------|

*Please go back and check that you have answered all the questions.*

***Thank you very much for your help answering this questionnaire!***
